# Supplementary material for: Out-of-plane surface patterning by subsurface processing of polymer substrates with focused ion beams
Source: publisher site journal article supplement (doi:10.3762/bjnano.11.151), 2020-11-06
Supplement: Additional file 1 [file 2190-4286-11-151-S1.pdf]

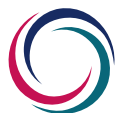

## Supporting Information

for

### **Out-of-plane surface patterning by subsurface processing of polymer substrates with focused ion beams**

Serguei Chiriaev, Luciana Tavares, Vadzim Adashkevich, Arkadiusz J. Goszczak and Horst-Günter Rubahn

*Beilstein J. Nanotechnol.* **2020**, *11*, 1693–1703. [doi:10.3762/bjnano.11.151](https://doi.org/10.3762/bjnano.11.151)

### **SRIM simulations**

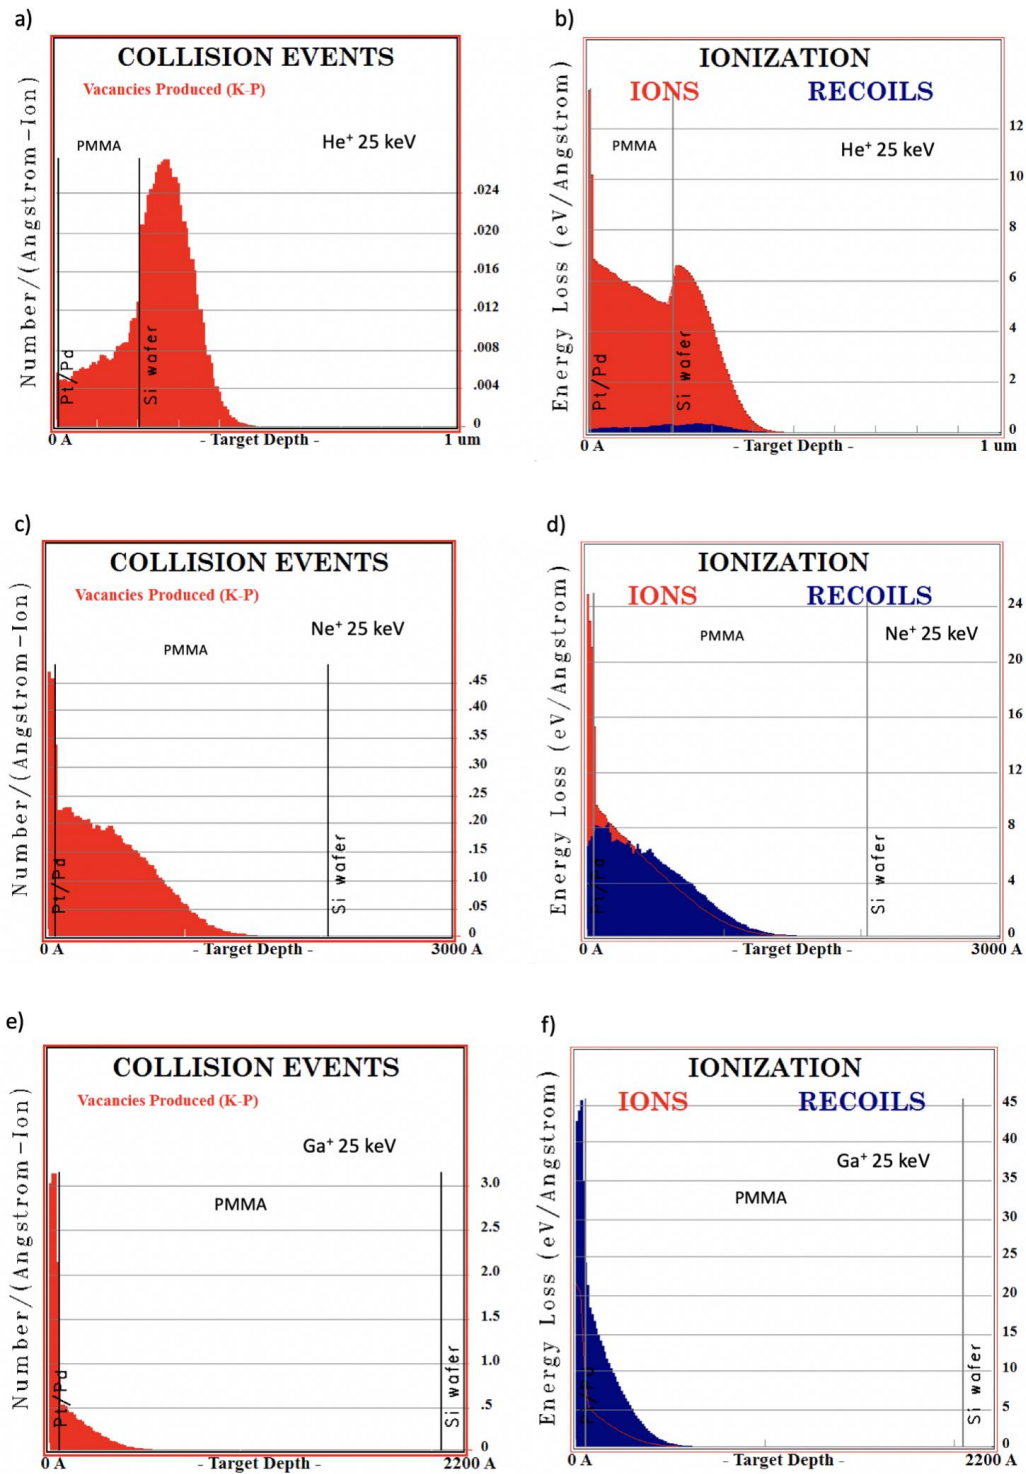

**Figure S1:** SRIM simulations of collision and ionization in the 5 nm Pt<sub>60</sub>Pd<sub>40</sub>/200 nm PMMA samples, irradiated with (a, b) He<sup>+</sup>, (c, d) Ne<sup>+</sup>, and (e, f) Ga<sup>+</sup> FIBs.
